# Supplementary material for: A Systemic Network Triggered by Human Cytomegalovirus Entry
Source: Hindawi journal article supplement (doi:10.1155/2011/262080), 2011-01-01
Supplement: f1 [file 262080.f1.pdf]

Figure S1, Network with down-regulated genes at both 5min and 25min post HCMV infection. More green of node color, more in down-regulation. No significant function can be annotated for this network in basis of gene ontology database.

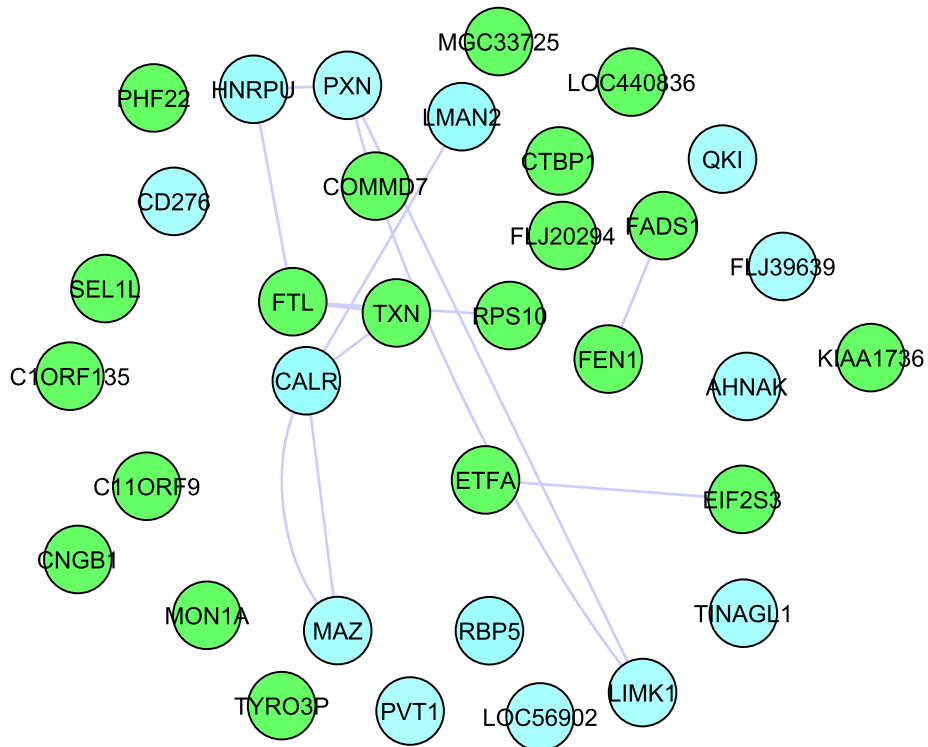

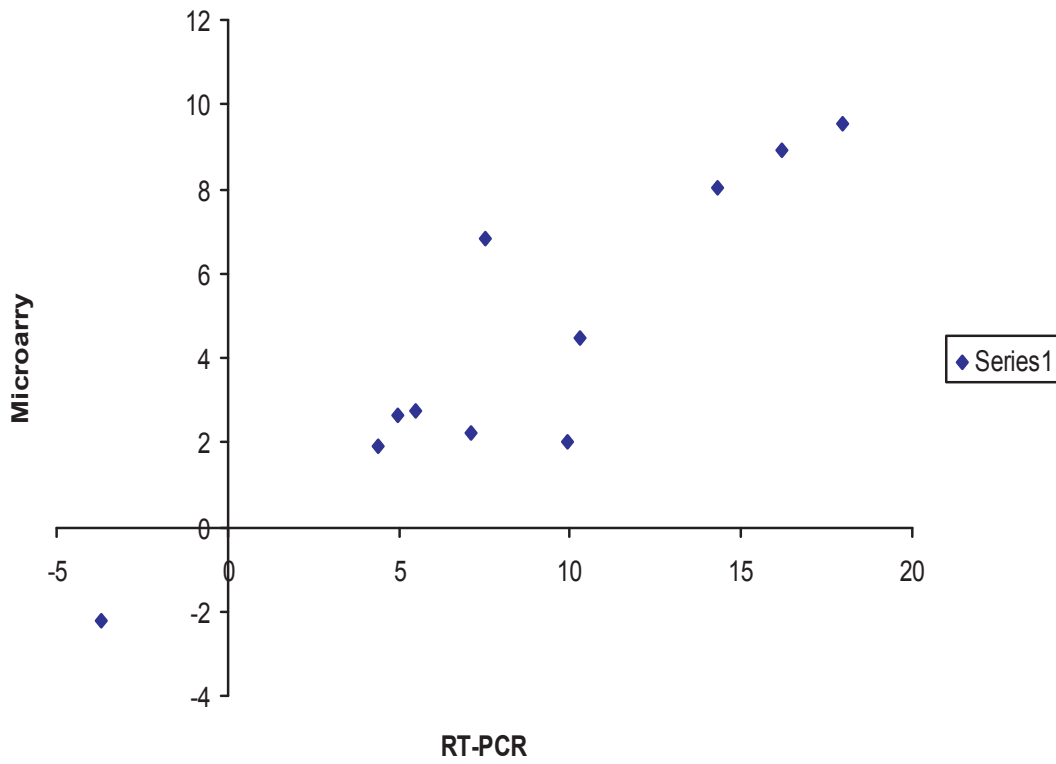

Figure S2. Correlation of gene expression alterations measured by real time RT-PCR and microarray. Total 11 genes were selected and Pearson correlation coefficient of data from these two methods was 0.89

**Table S1, samples of protein interaction codes for figure 1**

| <b>source</b> | <b>interaction type*</b> | <b>target</b> |
|---------------|--------------------------|---------------|
| ZSWIM2        | CE                       | TRIM42        |
| SH3BP1        | LI-ME                    | ARHGAP1       |
| SH3BP1        | LI-LO                    | AKT1          |
| SH3BP1        | LI-ME                    | CDC42         |
| SH3BP1        | LI-LO                    | PAK2          |
| SH3BP1        | LI-LO                    | RAC1          |
| SH3BP1        | HO                       | ARHGAP1       |
| SH3BP1        | EX                       | RAC1          |
| SH3BP1        | EX                       | GRB2          |
| TMPO          | PP                       | FOXC1         |
| TMPO          | LI-ME                    | TPR           |
| TMPO          | PP                       | TEK           |
| TMPO          | PP                       | ACP5          |
| TMPO          | PP                       | C1QTNF1       |
| TMPO          | PP                       | QPCT          |
| TMPO          | PP                       | ELAVL2        |
| TMPO          | PP                       | PRKAR1A       |

Interaction types are corresponding to that listed in figure 1.

PP represents protein-protein interaction

CE for Coexpression

LI-ME for literature-medium

LI-LO for literature-Low

HO for homology

EX for experimental

Literature-low,AG, medium, high respectively with max match 10,5,3,1.

All literature searches use context, concept lexicon restricts and interaction lexicon

Interacion resources were extracted from databases listed in materials and methods

Table S2 Genes activated by HCMV at 5min

| ID       | 25min fold | 5min fold change |
|----------|------------|------------------|
| KIAA0947 | 1.85       | 2.04             |
| SHC1     | -1.49      | -2.2             |
| PPT2     | 10.62      | 10.32            |
| TARBP1   | 3.38       | 3.72             |
| CNGB1    | -5.28      | -6.44            |
| PVT1     | -2.01      | -7.24            |
| DAPP1    | 2.49       | 3.92             |
| FLJ35205 | 1.6        | 2.04             |
| KIAA1736 | -2.52      | -2.08            |
| CBFB     | -1.71      | -4.52            |
| COL9A2   | 2.68       | 2.74             |
| MGC33725 | -2.52      | -2.08            |
| RASGRP2  | 2.41       | 2.21             |
| ADRA1A   | 6.29       | 8.14             |
| GLP1R    | 2.43       | 3.12             |
| LOC28350 | 1.74       | 3.63             |
| PAFAH1B1 | -1.23      | -2.45            |
| TMEM30A  | -1.32      | -3.04            |
| SELO     | 2.14       | 2.61             |
| TMEM49   | 1.54       | 2.24             |
| SCARA3   | -1.25      | -3.83            |
| IL4      | 5.3        | 4.7              |
| CASP2    | -1.52      | -2.38            |
| CLIC4    | -1.44      | -2.49            |
| CPD      | -1.2       | -2.55            |
| RAB1A    | 2.52       | 3.06             |
| EDG3     | -1.79      | -4.04            |
| AMFR     | -1.6       | -3.42            |
| FEN1     | -3.8       | -4.82            |
| RNASE2   | 6.1        | 6.59             |
| GLUL     | -1.38      | -2.06            |
| SOS1     | 5.13       | 7.92             |
| ETFA     | -14.89     | -12.77           |
| PRO1483  | 2.07       | 2.25             |
| CDC5L    | -1.63      | -2.03            |
| TJP1     | 2.01       | 3.32             |
| LOC40083 | 1.6        | 2.04             |
| C11ORF9  | -3.8       | -4.82            |
| SOX6     | 2.34       | 2.86             |
| PAK2     | -1.44      | -2.61            |
| MTNR1A   | 1.88       | 2.33             |
| FGFR1    | -1.46      | -2.18            |
| FRMD1    | 2.36       | 2.47             |
| ENG      | -1.7       | -3.81            |
| FTL      | -3.45      | -2.78            |
| HNRPU    | -2.35      | -4.73            |
| CRKRS    | -1.5       | 4.85             |

|          |       |       |
|----------|-------|-------|
| CALM2    | -1.55 | -2.61 |
| ARHGDI1  | -1.19 | -2.12 |
| RS1      | -1.76 | -4.47 |
| DOK2     | 7.89  | 9.84  |
| TEX14    | -1.2  | -6.95 |
| SEL1L    | -2.55 | -2.52 |
| PGAM4    | 6.09  | 13.62 |
| PHF8     | 2.48  | 2.18  |
| SOX1     | 4.58  | 3.38  |
| C12ORF38 | -1.64 | -2.37 |
| ELL2     | -1.21 | -2.35 |
| CT45-1   | 2.44  | 3.32  |
| DAAM2    | -1.76 | -2.02 |
| LOC50351 | 2.83  | 4.02  |
| RAB6A    | -1.53 | -4.54 |
| RAG2     | 3.52  | 4.46  |
| LOC28455 | 2.4   | 10.13 |
| NRG2     | 3.63  | 3.71  |
| DKFZP781 | 1.85  | 2.04  |
| MGC13821 | -1.02 | 6.28  |
| CYBRD1   | -1.33 | -3.62 |
| TINAGL1  | -2.16 | -2.39 |
| LOX      | -1.55 | -3.82 |
| SGCA     | 57.8  | 49.03 |
| ZNF155   | 9.43  | 8.79  |
| HP1BP3   | -1.78 | -2.09 |
| PSMA1    | -1.31 | -2.12 |
| FLJ45455 | -1.61 | -2.67 |
| ZNF43    | -1.74 | -2.37 |
| SCUBE3   | 2.05  | 2.48  |
| KCNC3    | 1.95  | 14.88 |
| SLC7A8   | -1.08 | -2.05 |
| MYH16    | -1.56 | -2.26 |
| TMED2    | -1.2  | -2.24 |
| MGC13187 | 2.14  | 2.61  |
| ARL6IP2  | -1.67 | -2.35 |
| RASGRF2  | 1.98  | 2.02  |
| PXN      | -2.02 | -4.05 |
| ABCC4    | -1.59 | -2.55 |
| CHMP4B   | -1.53 | -2.14 |
| NSMAF    | -1.24 | -3.93 |
| FLJ40244 | -1.02 | 6.28  |
| MGC10424 | 3.22  | 4.92  |
| PCDHGA1  | -1.44 | -4    |
| PPP1R7   | 2.8   | 2.82  |
| TXN      | -2.86 | -2.06 |
| TRPC5    | 3.46  | 4.28  |
| APOH     | 4.24  | 4.76  |
| BAPX1    | 3.74  | 4.95  |
| AVPR1B   | 2.4   | 3.13  |
| MMP14    | -1.58 | -2.03 |

|          |        |        |
|----------|--------|--------|
| IL1R1    | -1.43  | -5.99  |
| TYRO3P   | -14.89 | -12.77 |
| FUS      | -1.72  | -2.05  |
| MIB1     | 3.17   | 5.57   |
| SCARB2   | -1.44  | -2.28  |
| RNF170   | 3.66   | 2.96   |
| FADS1    | -3.8   | -4.82  |
| ATP13A3  | -1.39  | -2.3   |
| PRKAR1A  | -1.85  | -3.3   |
| SUV420H2 | -1.48  | -2.52  |
| IBSP     | 2.25   | 3.47   |
| RPS9     | 2.21   | 2.98   |
| LOC38879 | 2.58   | 2.56   |
| ASPH     | -1.59  | -3.37  |
| YWHAZ    | -1.37  | -2.25  |
| WDR1     | -1.44  | -2.81  |
| SMAD3    | -1.57  | -2.66  |
| YTHDF3   | -1.27  | -2.97  |
| MBP      | 2.12   | 2.1    |
| CD209    | 1.56   | 2.76   |
| ZADH2    | -1.51  | -2.28  |
| SORBS3   | -1.76  | -2.39  |
| DAF      | -1.83  | -2.65  |
| RUNX1    | 3.95   | 4.98   |
| LRP6     | 2.6    | 2.82   |
| EHD2     | -1.51  | -3.38  |
| ANXA13   | 2.68   | 3.43   |
| UBE2H    | 2.94   | 2.92   |
| TRAM1    | -1.21  | -2.1   |
| P140     | 2.81   | 2.31   |
| CANX     | -1.7   | -2.52  |
| CYB5R3   | -1.23  | -2.29  |
| PCDHGB3  | -1.44  | -4     |
| IL1RAPL1 | 2.17   | 2.61   |
| KIAA0157 | 1.71   | 2.11   |
| ZA20D1   | 3.26   | 3.51   |
| FBXO17   | 2.1    | 2.02   |
| BRUNOL5  | 2.17   | 3.89   |
| CALM1    | -1.55  | -2.61  |
| TRIM26   | 2.01   | 2.16   |
| NMNAT3   | 2.52   | 2.89   |
| VMD2     | 2.79   | 2.97   |
| AXL      | 1.57   | 2.36   |
| LOC40153 | 2.79   | 3.42   |
| NPR3     | 23.94  | 31.61  |
| ARPC4    | -1.67  | -2.22  |
| RAP2A    | 2.44   | 2.59   |
| MYO1G    | 2.02   | 3.14   |
| LRRFIP1  | -1.35  | -2.36  |
| EGR1     | 2.36   | 2.38   |
| FAM14B   | 2.37   | 2.11   |

|          |       |       |
|----------|-------|-------|
| ELAVL2   | 3.26  | 4.27  |
| LMO2     | 2.07  | 2.25  |
| PHF22    | -5.03 | -6.18 |
| KIAA1257 | 2.65  | 3.19  |
| CXCL14   | 3.57  | 5.54  |
| CSRP3    | 2.44  | 2.92  |
| DKFZP434 | 3.23  | 4.85  |
| MBNL1    | -1.29 | -3.67 |
| LMAN1    | -1.22 | -2.16 |
| MYH14    | 2.61  | 3.06  |
| C18ORF4  | -1.38 | -2.41 |
| LOC38845 | 3.06  | 3.49  |
| LOC56902 | -2.09 | -3.07 |
| EP400    | 1.92  | 2.43  |
| PCDHGB5  | -1.44 | -4    |
| NRAS     | -1.2  | -2.26 |
| YKT6     | -1.74 | -2.26 |
| LOC38965 | 2.33  | 2.81  |
| POLR2D   | 1.75  | 2.31  |
| GNG12    | -1.17 | -2.29 |
| GPX2     | 2.11  | 2.25  |
| C12ORF40 | 1.72  | 2.63  |
| LOC33931 | 1.63  | 2.38  |
| LOC28553 | 2.47  | 2.47  |
| FLJ90524 | 1.86  | 2.19  |
| LAMP1    | -1.91 | -2.56 |
| OTOA     | 3.92  | 2.96  |
| SFTPB    | 1.61  | 2.49  |
| VIT      | 2.81  | 2.84  |
| RBP5     | -2.4  | -7.87 |
| GRAP     | 3.12  | 2.86  |
| EPHA8    | -1.71 | -9.34 |
| CCR5     | 3.4   | 4.17  |
| CD52     | 1.76  | 2.21  |
| IL6ST    | -1.67 | -7.95 |
| C20ORF10 | 2.58  | 2.56  |
| ZRF1     | 2.18  | 2.94  |
| LMAN2    | -2.43 | -2.03 |
| LMAN1L   | 4.7   | 2.34  |
| DHX9     | -1.27 | -2.28 |
| AP3B2    | 4.95  | 4.6   |
| ARPP-21  | 8.94  | 8.92  |
| CYP4F12  | 1.95  | 2.03  |
| PDE8A    | 3.46  | 3.87  |
| LOC44105 | -1.74 | -2.62 |
| DKFZP434 | -1.57 | -2.72 |
| TFRC     | -1.51 | -9.09 |
| PTPRS    | 3.58  | 3.38  |
| PTPN12   | 3.75  | 6.04  |
| PPP4R1   | 2.35  | 2.34  |
| TMEM119  | -1.61 | -2.67 |

|          |       |       |
|----------|-------|-------|
| LOC90693 | 3.22  | 4.92  |
| MAP2K2   | -1.64 | -2.39 |
| SLC34A2  | 2.53  | 4     |
| XPNPEP1  | 1.88  | 2.35  |
| VRK3     | 1.93  | 2.95  |
| GPM6B    | 2.13  | 2.22  |
| DCP2     | 2.63  | 2.52  |
| WWP2     | 10.45 | 10.67 |
| AMOTL1   | 1.27  | -2.04 |
| INADL    | 3.86  | 4.87  |
| ZNF235   | 2.53  | 4.17  |
| TAF2     | 1.97  | 2.32  |
| SERPINA1 | 3.11  | 3.31  |
| C19ORF6  | -1.6  | -3.42 |
| ARPP21   | 8.94  | 8.92  |
| TRPM1    | 5.26  | 8.8   |
| LIMK1    | -2.03 | -2.46 |
| TGFBR2   | -1.44 | -4.15 |
| KIAA1109 | 3.52  | 4.04  |
| CPLX2    | 1.96  | 2.53  |
| FLJ39639 | -2.03 | -2.78 |
| PIP5K3   | 4.59  | 5     |
| SLC17A2  | 2.66  | 2.93  |
| SDHC     | -1.42 | -2.31 |
| DGKA     | 2.14  | 2.57  |
| STX1B2   | 3     | 2.06  |
| PCDHGC3  | -1.44 | -4    |
| PTGIS    | -1.76 | -2.32 |
| LOC33879 | 6.58  | 9.65  |
| PARK2    | 2.38  | 3.74  |
| POLA     | 5.3   | 4.4   |
| SEC61A1  | -1.39 | -2.97 |
| RAD51L1  | 3.85  | 3.21  |
| GNAO1    | 3.23  | 4.85  |
| CR1L     | 2.21  | 2.28  |
| UBXD3    | -1.47 | -3.66 |
| SEZ6     | 2.47  | 3.2   |
| LOC39170 | 3.27  | 2.78  |
| DNAH10   | 3.52  | 2.33  |
| MGC13175 | -1.48 | 3.01  |
| LOC38923 | 1.99  | 3.36  |
| ARID1B   | 2.67  | 2.36  |
| ADAM9    | -1.36 | -2.31 |
| HSPB6    | -1.43 | -2.65 |
| LOXL2    | -1.32 | -3.26 |
| PLIN     | 4.63  | 3.35  |
| MON1A    | -3.45 | -3.11 |
| FN1      | -1.54 | -6.4  |
| SYT2     | -1.68 | -2.51 |
| STIL     | 2.41  | 2.7   |
| HOXA2    | 3.93  | 7.3   |



|          |       |        |
|----------|-------|--------|
| GNB4     | -1.45 | -2.01  |
| NBR1     | -1.49 | -2.05  |
| TFAP2B   | 2.84  | 3.27   |
| DDX3X    | -1.32 | -2.24  |
| SIPA1L2  | 4.06  | 7.34   |
| BTN3A1   | -1.26 | -2.17  |
| RAB5A    | -1.4  | -2.25  |
| CEP27    | 2.71  | 2.51   |
| DAB2     | -1.08 | -2.44  |
| TBC1D1   | 2.44  | 2.58   |
| PSORS1C  | 3.03  | 2.79   |
| SLC10A1  | 2.29  | 2.55   |
| ZFP36L2  | -1.65 | -2.25  |
| CD44     | -1.3  | -2.3   |
| SAT      | 1.78  | 2.57   |
| SNIP     | 2.81  | 2.31   |
| NFIB     | 3.39  | 3.97   |
| LOC22296 | 3.5   | 4.65   |
| GNS      | -1.38 | -3.24  |
| AQP9     | 2.11  | 2.47   |
| COPA     | -1.56 | -6.58  |
| FGFR1OP  | 1.24  | 2.32   |
| OR1A1    | 2.11  | 2.19   |
| ANKRD17  | -1.39 | -2.38  |
| ACSS1    | 1.18  | 2.08   |
| 39327    | -1.28 | -2.34  |
| GNG4     | 2.79  | 2.96   |
| MAZ      | -2.16 | -2.31  |
| AHNAK    | -2.17 | -12.74 |
| CD276    | -2.11 | -9.3   |
| FOXP1    | 2.88  | 2.81   |
| ATP7A    | 6.09  | 13.62  |
| TPP1     | -1.32 | -2.81  |
| MUSTN1   | 2.42  | 2.63   |
| THBS1    | -1.69 | -2.6   |
| NNT      | -1.3  | -2.36  |
| MAT2A    | -1.85 | -3.21  |
| TEX13B   | 5.99  | 5.76   |
| QKI      | -2.11 | -3.27  |
| TEK      | 1.74  | 2.26   |
| SCARB1   | 19.51 | 22.55  |
| DBC1     | 3.32  | 3.37   |
| STC1     | -1.32 | -3.36  |
| PRRX1    | -1.2  | -2.39  |
| MCL1     | -1.43 | -4.2   |
| CLU      | 3.04  | 2.98   |
| NEDD4L   | 38.2  | 88.76  |
| LDLRAP1  | 1.13  | 4.38   |
| RUTBC2   | 1.54  | 3.66   |
| MPZL1    | -1.35 | -2.13  |
| RIN3     | 2.69  | 2.83   |

|          |       |       |
|----------|-------|-------|
| RPS4Y1   | 1.39  | 2.17  |
| ZNF621   | 2.37  | 2.39  |
| ANKH     | 2.01  | 2.16  |
| KIAA1199 | -1.6  | -2.51 |
| PCDHGA1  | -1.44 | -4    |
| EIF2S3   | -2.68 | -4.35 |
| MAPK10   | 7.65  | 14.07 |
| CCNB2    | 2.47  | 2.54  |
| HMGA1    | -1.66 | -4.35 |
| GPIAP1   | -1.08 | -2.03 |
| PCDHGB1  | -1.44 | -4    |
| CAPN13   | 1.73  | 3.66  |
| CALM3    | -1.44 | -2.48 |
| DCUN1D1  | -1.52 | -3.14 |
| MGC13822 | -1.02 | 6.28  |
| NASP     | 3.54  | 4.47  |
| MID2     | 5.99  | 5.76  |
| TCF4     | 2.74  | 3.27  |
| LOC14566 | 2.27  | 3.3   |
| DLGAP1   | 4.05  | 5.31  |
| CLEC4E   | 2.87  | 2.8   |
| RELA     | 2.23  | 2.85  |
| CALR     | -2.5  | -2.09 |
| MAPK1    | -1.5  | -2.04 |
| PICALM   | -1.21 | -2.57 |
| FGF5     | -1.07 | -2.35 |
| FLJ20294 | -2.52 | -2.08 |
| CD109    | -1.6  | -2.24 |
| GARNL3   | 4.84  | 5.57  |
| LOC91431 | 3.94  | 3.49  |
| IL1RN    | 6.81  | 9.21  |
| RORA     | 2.9   | 2.03  |
| RASD1    | -1.89 | -7.77 |
| PLEC1    | -1.26 | -2.17 |
| SCD      | -1.46 | -3.58 |
| WNT6     | -1.42 | -2.89 |
| DLX2     | 2.56  | 3.19  |
| SFRS1    | -1.21 | -2.43 |
| VAMP3    | -1.12 | -2.26 |
| RGS13    | -3.84 | 2.14  |
| KRAS     | 8.36  | 7.47  |
| TMEM83   | 3.04  | 3.13  |
| NDE1     | -1.6  | -2.1  |
| C1ORF135 | -7.17 | -4.96 |
| ABO      | -1.85 | -2.07 |
| CDV3     | -1.84 | -3.78 |
| ATP11A   | 1.74  | 3.63  |
| LOC55417 | 1.86  | 3.21  |
| DCBLD2   | -1.95 | -3.19 |
| C1ORF181 | -1.76 | -2.59 |
| PCDHGA2  | -1.44 | -4    |

|          |       |       |
|----------|-------|-------|
| PRR5     | 2.52  | 2.26  |
| COL6A1   | -1.38 | -2.86 |
| SLC7A4   | 4.38  | 2.87  |
| SOST     | 3.17  | 4.69  |
| LENEP    | 1.9   | 3.56  |
| IL21     | 3.57  | 4.5   |
| TNP2     | 2.37  | 3.64  |
| GPR176   | -1.27 | -2.24 |
| CHD3     | 2.78  | 3.96  |
| IGHM     | 2.23  | 2.69  |
| CTNNA1   | -1.63 | -3.17 |
| PRB4     | 4.66  | 6.93  |
| CTBP1    | -2.68 | -2.04 |
| ARHGAP1  | -1.37 | -2.28 |
| CHST12   | 3.11  | 3.99  |
| FLJ20185 | 2.52  | 2.26  |
| OSMR     | -1.06 | -2.19 |
| ADAMTSL  | 2.65  | 3.05  |
| EIF4G2   | -1.17 | -4.43 |
| CLN6     | 2.79  | 4.08  |
| RPS10    | -2.52 | -2.08 |
| LOC44258 | -1.48 | 3.01  |
| GP6      | 1.53  | 2.04  |
| TRUB1    | 2.36  | 2.41  |
| GTF2I    | -1.41 | -3.32 |
| SPEN     | 1.08  | -2.36 |
| EXOC5    | -1.21 | -2.13 |
| IFT172   | 1.85  | 2.14  |
| PPFIBP1  | -1.6  | -2.04 |
| ARHGAP1  | -1.5  | -2.83 |
| GATA4    | 2.86  | 3.36  |
| ATP2B4   | -1.18 | -2.47 |
| EPAS1    | -1.72 | -5.14 |
| EGFR     | 6.67  | 5.98  |
| LILRB3   | 1.94  | 2.05  |
| TXNDC    | -1.28 | -2.19 |
| SNX5     | 2.48  | 2.18  |
| APH1A    | -1.84 | -3.25 |
| USP37    | 3.02  | 3.04  |
| ETV6     | 4.08  | 4.23  |
| NRP1     | 2.06  | 2.7   |
| TP73L    | 2.22  | 2.29  |
| LOC40575 | 3.74  | 4.86  |
| YLPM1    | 4.28  | 5.18  |
| MGC35361 | 2.38  | 2.43  |
| SUPT16H  | -1.82 | -4.82 |
| LOC44083 | -3.24 | -2.82 |
| TMEM116  | 3.19  | 3.7   |
| SORCS2   | 2.91  | 2.83  |
| SLC39A14 | -1.56 | -2.35 |
| IGHG1    | 2.23  | 2.69  |

|          |        |       |
|----------|--------|-------|
| TIMP2    | -1.72  | -2.48 |
| ARF1     | -1.9   | -2.58 |
| MGC10427 | 2.58   | 2.56  |
| COMMD7   | -57.46 | -4.92 |

Table S3 Genes activated by HCMV at 25min

| ID       | 25 min fold change | 5min fold change |
|----------|--------------------|------------------|
| PDE8A    | 3.46               | 3.87             |
| PPT2     | 10.62              | 10.32            |
| TARBP1   | 3.38               | 3.72             |
| PTPRS    | 3.58               | 3.38             |
| PTPN12   | 3.75               | 6.04             |
| PPP4R1   | 2.35               | 2.34             |
| LOC90693 | 3.22               | 4.92             |
| CNGB1    | -5.28              | -6.44            |
| PVT1     | -2.01              | -7.24            |
| DAPP1    | 2.49               | 3.92             |
| SLC34A2  | 2.53               | 4                |
| GH1      | 2.19               | 1.97             |
| GPM6B    | 2.13               | 2.22             |
| KIAA1736 | -2.52              | -2.08            |
| DCP2     | 2.63               | 2.52             |
| WWP2     | 10.45              | 10.67            |
| COL9A2   | 2.68               | 2.74             |
| INADL    | 3.86               | 4.87             |
| MGC33725 | -2.52              | -2.08            |
| ZNF235   | 2.53               | 4.17             |
| ADRA1A   | 6.29               | 8.14             |
| RASGRP2  | 2.41               | 2.21             |
| GLP1R    | 2.43               | 3.12             |
| SERPINA1 | 3.11               | 3.31             |
| ARPP21   | 8.94               | 8.92             |
| TRPM1    | 5.26               | 8.8              |
| SELO     | 2.14               | 2.61             |
| LIMK1    | -2.03              | -2.46            |
| KIAA1109 | 3.52               | 4.04             |
| IL4      | 5.3                | 4.7              |
| FLJ39639 | -2.03              | -2.78            |
| PIP5K3   | 4.59               | 5                |
| SLC17A2  | 2.66               | 2.93             |
| RAB1A    | 2.52               | 3.06             |
| DGKA     | 2.14               | 2.57             |
| STX1B2   | 3                  | 2.06             |
| RNASE2   | 6.1                | 6.59             |
| FEN1     | -3.8               | -4.82            |
| ATXN2    | 2.07               | 2                |
| LOC33879 | 6.58               | 9.65             |
| SOS1     | 5.13               | 7.92             |
| ETFA     | -14.89             | -12.77           |
| PRO1483  | 2.07               | 2.25             |
| TJP1     | 2.01               | 3.32             |
| PARK2    | 2.38               | 3.74             |
| POLA     | 5.3                | 4.4              |
| NID1     | 2.17               | 1.43             |

|          |       |        |
|----------|-------|--------|
| RAD51L1  | 3.85  | 3.21   |
| C11ORF9  | -3.8  | -4.82  |
| SOX6     | 2.34  | 2.86   |
| GNAO1    | 3.23  | 4.85   |
| CR1L     | 2.21  | 2.28   |
| SEZ6     | 2.47  | 3.2    |
| FRMD1    | 2.36  | 2.47   |
| LOC39170 | 3.27  | 2.78   |
| FTL      | -3.45 | -2.78  |
| DNAH10   | 3.52  | 2.33   |
| HNRPU    | -2.35 | -4.73  |
| ARID1B   | 2.67  | 2.36   |
| PLIN     | 4.63  | 3.35   |
| STIL     | 2.41  | 2.7    |
| MON1A    | -3.45 | -3.11  |
| C9ORF95  | 3.33  | 1.11   |
| LOC28366 | 2.36  | 1.6    |
| HOXA2    | 3.93  | 7.3    |
| DOK2     | 7.89  | 9.84   |
| TFAP2B   | 2.84  | 3.27   |
| IL8      | 2.06  | 1.33   |
| CCNL1    | 2.14  | 1.87   |
| PRO0478  | 4.11  | -1.8   |
| SIPA1L2  | 4.06  | 7.34   |
| SEL1L    | -2.55 | -2.52  |
| PGAM4    | 6.09  | 13.62  |
| CEP27    | 2.71  | 2.51   |
| PHF8     | 2.48  | 2.18   |
| SOX1     | 4.58  | 3.38   |
| TBC1D1   | 2.44  | 2.58   |
| PSORS1C  | 3.03  | 2.79   |
| SLC10A1  | 2.29  | 2.55   |
| CT45-1   | 2.44  | 3.32   |
| SNIP     | 2.81  | 2.31   |
| NFIB     | 3.39  | 3.97   |
| NOL55    | -2.96 | 1.14   |
| LOC22296 | 3.5   | 4.65   |
| LOC50351 | 2.83  | 4.02   |
| AQP9     | 2.11  | 2.47   |
| RAG2     | 3.52  | 4.46   |
| LOC28455 | 2.4   | 10.13  |
| OR1A1    | 2.11  | 2.19   |
| NRG2     | 3.63  | 3.71   |
| ZNF155   | 9.43  | 8.79   |
| TINAGL1  | -2.16 | -2.39  |
| SGCA     | 57.8  | 49.03  |
| GNG4     | 2.79  | 2.96   |
| MAZ      | -2.16 | -2.31  |
| AHNAK    | -2.17 | -12.74 |
| CD276    | -2.11 | -9.3   |
| FOXP1    | 2.88  | 2.81   |

|          |        |        |
|----------|--------|--------|
| ATP7A    | 6.09   | 13.62  |
| SCUBE3   | 2.05   | 2.48   |
| MUSTN1   | 2.42   | 2.63   |
| MGC13187 | 2.14   | 2.61   |
| LOC38872 | 2.18   | 1.95   |
| TEX13B   | 5.99   | 5.76   |
| QKI      | -2.11  | -3.27  |
| SCARB1   | 19.51  | 22.55  |
| PXN      | -2.02  | -4.05  |
| DBC1     | 3.32   | 3.37   |
| CLU      | 3.04   | 2.98   |
| NEDD4L   | 38.2   | 88.76  |
| MGC10424 | 3.22   | 4.92   |
| PPP1R7   | 2.8    | 2.82   |
| RIN3     | 2.69   | 2.83   |
| TXN      | -2.86  | -2.06  |
| TRPC5    | 3.46   | 4.28   |
| ZNF621   | 2.37   | 2.39   |
| ANKH     | 2.01   | 2.16   |
| BAPX1    | 3.74   | 4.95   |
| APOH     | 4.24   | 4.76   |
| AVPR1B   | 2.4    | 3.13   |
| EIF2S3   | -2.68  | -4.35  |
| MAPK10   | 7.65   | 14.07  |
| CCNB2    | 2.47   | 2.54   |
| BRE      | 2.57   | 1.74   |
| TYRO3P   | -14.89 | -12.77 |
| SLC7A13  | 2.2    | 1.44   |
| MIB1     | 3.17   | 5.57   |
| NASP     | 3.54   | 4.47   |
| LOC28313 | -2.5   | -1.43  |
| RNF170   | 3.66   | 2.96   |
| MID2     | 5.99   | 5.76   |
| FADS1    | -3.8   | -4.82  |
| TCF4     | 2.74   | 3.27   |
| DLGAP1   | 4.05   | 5.31   |
| LOC14566 | 2.27   | 3.3    |
| IBSP     | 2.25   | 3.47   |
| CLEC4E   | 2.87   | 2.8    |
| RELA     | 2.23   | 2.85   |
| RPS9     | 2.21   | 2.98   |
| LOC38879 | 2.58   | 2.56   |
| CALR     | -2.5   | -2.09  |
| FLJ20294 | -2.52  | -2.08  |
| GARNL3   | 4.84   | 5.57   |
| LOC91431 | 3.94   | 3.49   |
| IL1RN    | 6.81   | 9.21   |
| RORA     | 2.9    | 2.03   |
| MBP      | 2.12   | 2.1    |
| DLX2     | 2.56   | 3.19   |
| WNT4     | -2.27  | -2     |

|          |       |       |
|----------|-------|-------|
| SC65     | -2.96 | 1.14  |
| RUNX1    | 3.95  | 4.98  |
| LRP6     | 2.6   | 2.82  |
| ANXA13   | 2.68  | 3.43  |
| RGS13    | -3.84 | 2.14  |
| UBE2H    | 2.94  | 2.92  |
| TP53INP1 | 2.09  | 1.87  |
| P140     | 2.81  | 2.31  |
| TMEM83   | 3.04  | 3.13  |
| KRAS     | 8.36  | 7.47  |
| C1ORF135 | -7.17 | -4.96 |
| IL1RAPL1 | 2.17  | 2.61  |
| ZA20D1   | 3.26  | 3.51  |
| FBXO17   | 2.1   | 2.02  |
| FOXK2    | 4.11  | -1.8  |
| MALAT1   | -2.5  | -1.43 |
| BRUNOL5  | 2.17  | 3.89  |
| TRIM26   | 2.01  | 2.16  |
| NMNAT3   | 2.52  | 2.89  |
| VMD2     | 2.79  | 2.97  |
| TDGF1    | 12.6  | -1.74 |
| PRR5     | 2.52  | 2.26  |
| SLC7A4   | 4.38  | 2.87  |
| SOST     | 3.17  | 4.69  |
| LOC40153 | 2.79  | 3.42  |
| NPR3     | 23.94 | 31.61 |
| CYR61    | 2.09  | 1.87  |
| RAP2A    | 2.44  | 2.59  |
| IL21     | 3.57  | 4.5   |
| TNP2     | 2.37  | 3.64  |
| MYO1G    | 2.02  | 3.14  |
| CHD3     | 2.78  | 3.96  |
| IGHM     | 2.23  | 2.69  |
| PRB4     | 4.66  | 6.93  |
| FAM14B   | 2.37  | 2.11  |
| CTBP1    | -2.68 | -2.04 |
| EGR1     | 2.36  | 2.38  |
| ELAVL2   | 3.26  | 4.27  |
| PHF22    | -5.03 | -6.18 |
| LMO2     | 2.07  | 2.25  |
| LSM4     | -2.13 | -1.55 |
| KIAA1257 | 2.65  | 3.19  |
| CXCL14   | 3.57  | 5.54  |
| CSRP3    | 2.44  | 2.92  |
| CHST12   | 3.11  | 3.99  |
| FLJ20185 | 2.52  | 2.26  |
| DKFZP434 | 3.23  | 4.85  |
| ADAMTSL  | 2.65  | 3.05  |
| MYH14    | 2.61  | 3.06  |
| CLN6     | 2.79  | 4.08  |
| RPS10    | -2.52 | -2.08 |



|          |        |       |
|----------|--------|-------|
| LOC38845 | 3.06   | 3.49  |
| NTRK3    | -2.43  | 1.56  |
| LOC56902 | -2.09  | -3.07 |
| TRUB1    | 2.36   | 2.41  |
| LOC38965 | 2.33   | 2.81  |
| ADAMTS1  | 68.77  | -1.84 |
| GATA4    | 2.86   | 3.36  |
| CLSTN2   | 2.59   | 1.42  |
| EGFR     | 6.67   | 5.98  |
| SNX5     | 2.48   | 2.18  |
| GPX2     | 2.11   | 2.25  |
| USP37    | 3.02   | 3.04  |
| ETV6     | 4.08   | 4.23  |
| VPS53    | 2.28   | 2     |
| NRP1     | 2.06   | 2.7   |
| LOC40575 | 3.74   | 4.86  |
| TP73L    | 2.22   | 2.29  |
| YLPM1    | 4.28   | 5.18  |
| CD86     | 2.18   | 1.98  |
| LOC28553 | 2.47   | 2.47  |
| LLGL1    | -2.08  | -1.97 |
| MGC35361 | 2.38   | 2.43  |
| OTOA     | 3.92   | 2.96  |
| LOC44083 | -3.24  | -2.82 |
| TMEM116  | 3.19   | 3.7   |
| SORCS2   | 2.91   | 2.83  |
| VIT      | 2.81   | 2.84  |
| RBP5     | -2.4   | -7.87 |
| GRAP     | 3.12   | 2.86  |
| CCR5     | 3.4    | 4.17  |
| IGHG1    | 2.23   | 2.69  |
| C20ORF10 | 2.58   | 2.56  |
| ZRF1     | 2.18   | 2.94  |
| C1ORF156 | 3.6    | 1.69  |
| LMAN2    | -2.43  | -2.03 |
| LMAN1L   | 4.7    | 2.34  |
| AP3B2    | 4.95   | 4.6   |
| MGC10427 | 2.58   | 2.56  |
| COMMD7   | -57.46 | -4.92 |
| ARPP-21  | 8.94   | 8.92  |

Table S4 Genes enhanced by HCMV infection at both 5min and 25min

| Genes    | 5min fold | c25min fold change |
|----------|-----------|--------------------|
| RAD51L1  | 3.21      | 3.85               |
| FAM14B   | 2.11      | 2.37               |
| AP3B2    | 4.6       | 4.95               |
| LRP6     | 2.82      | 2.6                |
| KIAA1109 | 4.04      | 3.52               |
| EGR1     | 2.38      | 2.36               |
| RNASE2   | 6.59      | 6.1                |
| ANKH     | 2.16      | 2.01               |
| TP73L    | 2.29      | 2.22               |
| ETV6     | 4.23      | 4.08               |
| IL1RN    | 9.21      | 6.81               |
| CCR5     | 4.17      | 3.4                |
| DLX2     | 3.19      | 2.56               |
| OR1A1    | 2.19      | 2.11               |
| PDE8A    | 3.87      | 3.46               |
| ZA20D1   | 3.51      | 3.26               |
| PPP4R1   | 2.34      | 2.35               |
| TCF4     | 3.27      | 2.74               |
| SCARB1   | 22.55     | 19.51              |
| IGHG1    | 2.69      | 2.23               |
| TRPM1    | 8.8       | 5.26               |
| IBSP     | 3.47      | 2.25               |
| HOXA2    | 7.3       | 3.93               |
| AVPR1B   | 3.13      | 2.4                |
| RELA     | 2.85      | 2.23               |
| USP37    | 3.04      | 3.02               |
| ARID1B   | 2.36      | 2.67               |
| NPR3     | 31.61     | 23.94              |
| GATA4    | 3.36      | 2.86               |
| GLP1R    | 3.12      | 2.43               |
| NASP     | 4.47      | 3.54               |
| TFAP2B   | 3.27      | 2.84               |
| PIP5K3   | 5         | 4.59               |
| GNAO1    | 4.85      | 3.23               |
| DLGAP1   | 5.31      | 4.05               |
| CCNB2    | 2.54      | 2.47               |
| SCUBE3   | 2.48      | 2.05               |
| RASGRP2  | 2.21      | 2.41               |
| RPS9     | 2.98      | 2.21               |
| TJP1     | 3.32      | 2.01               |
| UBE2H    | 2.92      | 2.94               |
| SOST     | 4.69      | 3.17               |
| MAPK10   | 14.07     | 7.65               |
| NFIB     | 3.97      | 3.39               |
| IL21     | 4.5       | 3.57               |
| MIB1     | 5.57      | 3.17               |
| ANXA13   | 3.43      | 2.68               |
| TRPC5    | 4.28      | 3.46               |

|          |       |       |
|----------|-------|-------|
| DAPP1    | 3.92  | 2.49  |
| NRG2     | 3.71  | 3.63  |
| FLJ20185 | 2.26  | 2.52  |
| SLC34A2  | 4     | 2.53  |
| ADRA1A   | 8.14  | 6.29  |
| SGCA     | 49.03 | 57.8  |
| WWP2     | 10.67 | 10.45 |
| TNP2     | 3.64  | 2.37  |
| FOXP1    | 2.81  | 2.88  |
| SIPA1L2  | 7.34  | 4.06  |
| SLC10A1  | 2.55  | 2.29  |
| CR1L     | 2.28  | 2.21  |
| CLN6     | 4.08  | 2.79  |
| GNG4     | 2.96  | 2.79  |
| PARK2    | 3.74  | 2.38  |
| RAP2A    | 2.59  | 2.44  |
| NEDD4L   | 88.76 | 38.2  |
| SOX1     | 3.38  | 4.58  |
| PHF8     | 2.18  | 2.48  |
| RAB1A    | 3.06  | 2.52  |
| DGKA     | 2.57  | 2.14  |
| ZRF1     | 2.94  | 2.18  |
| EGFR     | 5.98  | 6.67  |
| P140     | 2.31  | 2.81  |
| CLU      | 2.98  | 3.04  |
| PRB4     | 6.93  | 4.66  |
| TRUB1    | 2.41  | 2.36  |
| INADL    | 4.87  | 3.86  |
| GRAP     | 2.86  | 3.12  |
| PPT2     | 10.32 | 10.62 |
| DCP2     | 2.52  | 2.63  |
| BAPX1    | 4.95  | 3.74  |
| NRP1     | 2.7   | 2.06  |
| RORA     | 2.03  | 2.9   |
| PLIN     | 3.35  | 4.63  |
| KRAS     | 7.47  | 8.36  |
| ELAVL2   | 4.27  | 3.26  |
| SOS1     | 7.92  | 5.13  |
| COL9A2   | 2.74  | 2.68  |
| ZNF621   | 2.39  | 2.37  |
| TRIM26   | 2.16  | 2.01  |
| CXCL14   | 5.54  | 3.57  |
| PRR5     | 2.26  | 2.52  |
| APOH     | 4.76  | 4.24  |
| IGHM     | 2.69  | 2.23  |
| PGAM4    | 13.62 | 6.09  |
| SOX6     | 2.86  | 2.34  |
| DOK2     | 9.84  | 7.89  |
| CHD3     | 3.96  | 2.78  |
| RUNX1    | 4.98  | 3.95  |
| POLA     | 4.4   | 5.3   |

|          |       |      |
|----------|-------|------|
| ZNF155   | 8.79  | 9.43 |
| PTPN12   | 6.04  | 3.75 |
| LMO2     | 2.25  | 2.07 |
| IL1RAPL1 | 2.61  | 2.17 |
| MBP      | 2.1   | 2.12 |
| RAG2     | 4.46  | 3.52 |
| SNX5     | 2.18  | 2.48 |
| ATP7A    | 13.62 | 6.09 |
| RIN3     | 2.83  | 2.69 |
| GARNL3   | 5.57  | 4.84 |
| CSRP3    | 2.92  | 2.44 |
| VMD2     | 2.97  | 2.79 |
| PSORS1C  | 2.79  | 3.03 |
| SORCS2   | 2.83  | 2.91 |
| CHST12   | 3.99  | 3.11 |
| IL4      | 4.7   | 5.3  |
| PTPRS    | 3.38  | 3.58 |
| AQP9     | 2.47  | 2.11 |
| VIT      | 2.84  | 2.81 |
| TARBP1   | 3.72  | 3.38 |
| CLEC4E   | 2.8   | 2.87 |
| FBXO17   | 2.02  | 2.1  |
| SLC17A2  | 2.93  | 2.66 |
| SERPINA1 | 3.31  | 3.11 |
